# Supplementary material
Source: ML conference proceedings conference paper supplement (https://proceedings.mlr.press/v37/avron15.html)
Supplement: Supplementary file [file avron15-supp.pdf]

---

# Community Detection Using Time-Dependent Personalized PageRank

## Supplementary Material

---

### 6. Appendix: Pseudocode

```
1: Input: Graph  $G$ , sparse seed vector  $\mathbf{s} \in \mathbb{R}^{|V|}$ ,  $\alpha$ ,  $\gamma$  and  $\epsilon$ .
2:
3: Choose  $N$ , as explained in subsection 3.3.
4: Compute  $\Xi_1^+$  and  $\mathbf{u}$  as defined in subsection 3.2.3.
5:
6: violating  $\leftarrow$  empty_queue
7:
8: # Initialize non-zero functions (i.e., indexes with non-zero seed value)
9: for each  $u$  s.t.  $s_u \neq 0$ :  $\mathbf{y}_u \leftarrow s_u \mathbf{1}_{N+1}$ ,  $\mathbf{r}_i \leftarrow -\alpha s_u \mathbf{1}_{N+1}$ 
10:
11: # Initialize neighbors of seeds that are not seeds
12: for  $u$  s.t.  $s_u \neq 0$  do
13:   for each  $v \in G.neighbors(u)$  s.t.  $s_v = 0$ :  $\mathbf{y}_v \leftarrow \mathbf{0}_{N+1}$ ,  $\mathbf{r}_v \leftarrow \mathbf{0}_{N+1}$ 
14: end for
15:
16: # Update residual based on seeds
17: for  $u$  s.t.  $(\mathbf{s})_u \neq 0$  do
18:   for each  $v \in G.neighbors(u)$ :  $\mathbf{r}_v \leftarrow \mathbf{r}_v + \alpha \mathbf{y}_u / G.degree(u)$ 
19: end for
20: for each initialized  $\mathbf{u}$  s.t.  $\|\mathbf{r}_u\|_\infty \geq \frac{(1-\alpha) \cdot G.degree(u) \cdot \epsilon}{(1-\exp((\alpha-1)\gamma))(1+\frac{2}{\pi} \log N)}$ : violating.push(u)
21:
22: # Main loop
23: while violating is not empty do
24:    $u \leftarrow$  violating.pop()
25:    $\mathbf{d} \leftarrow \Xi_1^+ \mathbf{r}_u$ 
26:    $\mathbf{y}_u \leftarrow \mathbf{y}_u + \mathbf{d}$ 
27:    $\mathbf{r}_u \leftarrow (\mathbf{u}^T \mathbf{d}) \mathbf{u}$ 
28:   for  $v \in G.neighbors(u)$  do
29:     if  $\mathbf{y}_v$  and  $\mathbf{r}_v$  have not been initialized yet:  $\mathbf{y}_v \leftarrow \mathbf{0}_{N+1}$ ,  $\mathbf{r}_v \leftarrow \mathbf{0}_{N+1}$ 
30:      $\mathbf{r}_v \leftarrow \mathbf{r}_v + \alpha \mathbf{d} / G.degree(u)$ 
31:     unless  $v$  is already in violating: if  $\|\mathbf{r}_v\|_\infty \geq \frac{(1-\alpha) \cdot G.degree(v) \cdot \epsilon}{(1-\exp((\alpha-1)\gamma))(1+\frac{2}{\pi} \log N)}$ : violating.push(v)
32:   end for
33: end while
34:
35: return the first coordinate of  $y_u$  for  $u$ 's that have been initialized and for which the value  $\neq 0$ .
```

## 7. Appendix: Proofs

### 7.1. Proof of Proposition 1

Let  $\mathbf{e}(\cdot) \equiv \mathbf{x}(\cdot) - \mathbf{y}(\cdot)$ .  $\mathbf{e}(\cdot)$  is the solution to the following initial value problem:

$$\mathbf{e}'(t) = -(I - \alpha P)\mathbf{e}(t) + \mathbf{r}(t), \quad \mathbf{e}(0) = 0, \quad t \in [0, \gamma].$$

It follows that (Botchev et al., 2013)

$$\begin{aligned} \mathbf{e}(t) &= \int_0^t \exp(-(t-s)(I - \alpha P))\mathbf{r}(s)ds \\ &= \int_0^t \exp(s-t) \exp((t-s)\alpha P)\mathbf{r}(s)ds. \end{aligned}$$

(The last inequality follows from the fact that  $\exp(t\mathbf{A})\exp(t\mathbf{B}) = \exp(t(\mathbf{A} + \mathbf{B})) \iff \mathbf{A}\mathbf{B} = \mathbf{B}\mathbf{A}$ .)

For any  $\omega$ , we have

$$\begin{aligned} \mathbf{D}^{-1} \exp(\omega P) &= \mathbf{D}^{-1} \exp(\omega \mathbf{A} \mathbf{D}^{-1}) \\ &= \mathbf{D}^{-1} \sum_{k=0}^{\infty} \frac{\omega^k}{k!} (\mathbf{A} \mathbf{D}^{-1})^k \\ &= \left( \sum_{k=0}^{\infty} \frac{\omega^k}{k!} (\mathbf{D}^{-1} \mathbf{A})^k \right) \mathbf{D}^{-1} \\ &= \exp(\omega \mathbf{P}^T) \mathbf{D}^{-1}. \end{aligned}$$

It follows that

$$\begin{aligned} \mathbf{D}^{-1} \mathbf{e}(t) &= \int_0^t \exp(s-t) \mathbf{D}^{-1} \exp((t-s)\alpha P)\mathbf{r}(s)ds \\ &= \int_0^t \exp(s-t) \exp((t-s)\alpha \mathbf{P}^T) \mathbf{D}^{-1} \mathbf{r}(s)ds. \end{aligned}$$

Recalling that  $\mathbf{P}$  is row-stochastic, we can now bound

$$\begin{aligned} \|\mathbf{D}^{-1} \mathbf{e}(t)\|_{\infty} &\leq \int_0^t \exp(s-t) \cdot \|\exp((t-s)\alpha \mathbf{P}^T) \mathbf{D}^{-1} \mathbf{r}(s)\|_{\infty} ds \\ &\leq \int_0^t \exp(s-t) \cdot \|\exp((t-s)\alpha \mathbf{P}^T)\|_{\infty} \cdot \|\mathbf{D}^{-1} \mathbf{r}(s)\|_{\infty} ds \\ &= \int_0^t \exp((1-\alpha)(s-t)) \|\mathbf{D}^{-1} \mathbf{r}(s)\|_{\infty} ds \end{aligned}$$

The last equality is because  $\mathbf{P}$  is row-stochastic: for  $\omega \geq 0$  we have

$$\begin{aligned} \|\exp(\omega \mathbf{P}^T)\|_{\infty} &= \left\| \sum_{k=0}^{\infty} \frac{\omega^k}{k!} (\mathbf{P}^T)^k \right\|_{\infty} \\ &= \sum_{k=0}^{\infty} \frac{\omega^k}{k!} \|(\mathbf{P}^T)^k\|_{\infty} \\ &= \sum_{k=0}^{\infty} \frac{\omega^k}{k!} \\ &= \exp(\omega). \end{aligned}$$

The second equality is due to the fact that  $\mathbf{P}^T$  has only positive values, and the third is because  $\mathbf{P}$  is row-stochastic.

Clearly if

$$\frac{1 - \exp((\alpha - 1)\gamma)}{1 - \alpha} \|d_i^{-1} r_i(\cdot)\|_\infty < \epsilon$$

for all  $i$  then condition (3) holds for all  $t \in [0, \gamma]$ . This is equivalent to having

$$\|r_i(\cdot)\|_\infty < \frac{(1 - \alpha)d_i\epsilon}{1 - \exp((\alpha - 1)\gamma)}$$

for all  $i$ .

## 7.2. Proof of Proposition 2

Let  $\mathbb{S}_N^{-1}$  be the inverse operator of  $\mathbb{S}_N$  on  $C([0, \gamma])$ , the set of continuous functions on  $[0, \gamma]$ . That is,  $\mathbb{S}_N^{-1}$  maps a vector in  $\mathbb{R}^{N+1}$  to the unique interpolating polynomial. In particular,  $\mathbb{S}_N^{-1}[\mathbb{S}_N[p(\cdot)]] = p(\cdot)$ . Let  $\Pi_N$  be the mapping of a continuous function  $[0, \gamma]$  to  $\mathbb{P}_N$  by sampling at  $t_0, \dots, t_N$  and interpolating, that is  $\Pi_N[f(\cdot)] \equiv \mathbb{S}_N^{-1}[\mathbb{S}_N[f(\cdot)]]$ . Let

$$\Lambda_N \equiv \sup_{f(\cdot) \in C([0, \gamma])} \frac{\|\Pi_N[f(\cdot)]\|_\infty}{\|f(\cdot)\|_\infty}.$$

$\Lambda_N$  is the *Lebesgue constant* associated with  $t_0, \dots, t_N$ , and it is well known that  $\Lambda_N \leq 1 + \frac{2}{\pi} \log N$ . Now let  $f(\cdot)$  be a piece-wise linear interpolation of  $p(t_0), \dots, p(t_N)$ . Since  $\mathbb{S}_N[f(\cdot)] = \mathbb{S}_N[p(\cdot)]$  it follows that  $\Pi_N[f(\cdot)] = \Pi_N[p(\cdot)] = p(\cdot)$ , so

$$\|p(\cdot)\|_\infty = \|\Pi_N[f(\cdot)]\|_\infty \leq \Lambda_N \|f(\cdot)\|_\infty \leq (1 + \frac{2}{\pi} \log N) \|\mathbb{S}_N[p(\cdot)]\|_\infty.$$

## 7.3. Proof of Lemma 3

We have

$$\|(\Xi + \mathbf{I}_{N+1})\mathbf{1}_{N+1}\|_\infty \leq \|(\Xi + \mathbf{I}_{N+1})\mathbf{1}_{N+1}\|_2 = \min_{\mathbf{x}} \|\Xi\mathbf{x} - \mathbf{1}_{N+1}\|_2,$$

so it suffices to show there exists a vector  $\mathbf{y} \in \mathbb{R}^{N+1}$  such that

$$\|(\Xi + \mathbf{I}_{N+1})\mathbf{y} - \mathbf{1}_{N+1}\|_2,$$

under the constraint that  $y_{N+1} = 0$ .

We use the following expansion of  $\exp(\cdot)$  on  $[0, \gamma]$  in the basis of the Chebyshev polynomials (Abramowitz & Stegun, 1964):

$$\exp(-t) = a_0 + \sum_{i=1}^{\infty} a_i T_i\left(\frac{2t - \gamma}{\gamma}\right)$$

$$a_0 = \exp(-\gamma/2) I_0(-\gamma/2) \quad a_i = 2 \exp(-\gamma/2) I_i(-\gamma/2), \quad k \geq 1$$

where  $T_0(\cdot), T_1(\cdot), \dots$  are the Chebyshev polynomials of the first kind, and  $I_0(\cdot), I_1(\cdot), \dots$  are the modified Bessel functions of the first kind.

Let

$$p(t) = 1 - a_0 - \sum_{i=1}^N a_i T_i\left(\frac{2t - \gamma}{\gamma}\right) + c$$

where  $c$  is a constant selected so that  $p(0) = 0$ . We now set  $\mathbf{y} = \mathbb{S}_N[p(\cdot)]$ . Note that  $y_{N+1} = 0$ , as required.

$p(\cdot)$  is a polynomial of degree  $N$ , so  $\mathbb{S}_N[p'(\cdot)] = \Xi \mathbb{S}_N[p(\cdot)]$ . Therefore,

$$\begin{aligned} \|(\Xi + \mathbf{I}_N)\mathbf{y} - \mathbf{1}_N\|_2 &\leq \sqrt{N} \|(\Xi + \mathbf{I}_N)\mathbf{y} - \mathbf{1}_N\|_\infty \\ &\leq \sqrt{N} \|p(\cdot) + p'(\cdot) - 1\|_\infty \end{aligned}$$

For  $t \in [0, \gamma]$

$$\begin{aligned}
 |p(t) + p'(t) - 1| &= |p(t) - 1 - \exp(-t) + p'(t) + \exp(-t)| \\
 &\leq |p(t) - 1 - \exp(-t)| + |p'(t) + \exp(-t)| \\
 &= \left| -\sum_{i=N+1}^{\infty} a_i T_i \left( \frac{2t - \gamma}{\gamma} \right) + c \right| + |p'(t) + \exp(-t)| \\
 &\leq \left| \sum_{i=N+1}^{\infty} a_i T_i \left( \frac{2t - \gamma}{\gamma} \right) \right| + |c| + |p'(t) + \exp(-t)| \\
 &\leq \sum_{i=N+1}^{\infty} |a_i| + |c| + |p'(t) + \exp(-t)|
 \end{aligned}$$

where the last inequality is due to the fact that  $\|T_i(\cdot)\|_{\infty} = 1$  for all  $i$ .

Since  $\exp(0) = 1$  we have

$$1 = a_0 + \sum_{i=1}^{\infty} a_i T_i(-1)$$

which implies

$$\begin{aligned}
 -c &= p(0) - c \\
 &= 1 - a_0 - \sum_{i=1}^N a_i T_i(0) \\
 &= \sum_{i=N+1}^{\infty} a_i T_i(0)
 \end{aligned}$$

which leads to the bound

$$|c| \leq \sum_{i=N+1}^{\infty} |a_i|.$$

Using the fact that  $T_i'(t) = iU_{i-1}(t)$ , where  $U_0(\cdot), U_1(\cdot), \dots$  are the Chebyshev polynomials of the second kind, we find that

$$p'(t) = \frac{2}{\gamma} \sum_{i=1}^N i a_i U_{i-1} \left( \frac{2t - \gamma}{\gamma} \right).$$

Since  $(\exp(-t))' = -\exp(-t)$  we have

$$\exp(-t) = -\frac{2}{\gamma} \sum_{i=1}^{\infty} i a_i U_{i-1} \left( \frac{2t - \gamma}{\gamma} \right).$$

Combining the last two equalities we find

$$\begin{aligned}
 |p'(t) + \exp(-t)| &= \left| \frac{2}{\gamma} \sum_{i=N+1}^{\infty} i a_i U_{i-1} \left( \frac{2t - \gamma}{\gamma} \right) \right| \\
 &\leq \frac{2}{\gamma} \sum_{i=N+1}^{\infty} i^2 |a_i|
 \end{aligned}$$

where the last inequality is due to the fact that  $\|U_i(\cdot)\|_{\infty} = i + 1$  for all  $i$ .

We now find that

$$\begin{aligned}
 |p(t) + p'(t) - 1| &\leq \sum_{i=N+1}^{\infty} \left(2 + \frac{2}{\gamma} i^2\right) |a_i| \\
 &= 4 \sum_{i=N+1}^{\infty} \left| \left(1 + \frac{1}{\gamma} i^2\right) \exp(-\gamma/2) I_i(-\gamma/2) \right| \\
 &= 4 \exp(-\gamma/2) \sum_{i=N+1}^{\infty} \left(1 + \frac{1}{\gamma} i^2\right) I_i(\gamma/2),
 \end{aligned}$$

where last equality is due to the fact that for every integer  $i$ ,  $|I_i(x)| = I_i(|x|)$ .

The following two inequalities are known (Paris, 1984; Laforgia, 1991):

$$\frac{I_\nu(x)}{I_\nu(y)} \leq \left(\frac{x}{y}\right)^\nu, \quad \nu > -\frac{1}{2}, \quad 0 < x < y$$

$$I_{\nu+1}(x) \leq I_\nu(x), \quad \nu > \frac{1}{2}.$$

This now leads to

$$|p(t) + p'(t) - 1| \leq 4 \exp(-\gamma/2) I_{N+1}(\gamma) \sum_{i=N+1}^{\infty} \left(1 + \frac{1}{\gamma} i^2\right) 2^{-i}.$$

Provided  $\gamma \geq 1$  and  $i \geq 11$  we have  $(1 + i^2/\gamma)2^{-i} \leq (4/5)^{-i}$ , so

$$|p(t) + p'(t) - 1| \leq 4 \exp(-\gamma/2) I_{N+1}(\gamma) \sum_{i=N+1}^{\infty} (4/5)^{-i} = 20 \exp(-\gamma/2) I_{N+1}(\gamma) (4/5)^{N+1}.$$
